# Supplementary material for: Efficacy of Antioxidant Supplementation on Conventional and Advanced Sperm Function Tests in Patients with Idiopathic Male Infertility
Source: PubMed Central journal article supplement (PMC7139646; doi:10.3390/antiox9030219), 2020-03-06
Supplement: antioxidants-09-00219-s001.pdf [file antioxidants-09-00219-s001.pdf]

**Supplementary Materials:**

**Table S1.** Number and percentage of patients with oligozoospermia, asthenozoospermia and teratozoospermia before and after the treatment with FH PRO for Men. Total number of patients included in the study:  $n = 119$ .

| <b>Group</b>      | <b>Number of Patients (Percentage)</b> |                            |                    | <i>p</i> -value<br>McNemar Test |
|-------------------|----------------------------------------|----------------------------|--------------------|---------------------------------|
|                   | <b>Before<br/>Treatment</b>            | <b>After<br/>Treatment</b> | <b>Improvement</b> |                                 |
| Oligozoospermic   | 79 (53.4%)                             | 56 (37.8%)                 | 45 (56.9%)         | 0.0026                          |
| Asthenozoospermic | 72 (48.6%)                             | 53 (35.8%)                 | 29 (40.3%)         | 0.0064                          |
| Teratozoospermic  | 98 (66.2%)                             | 70 (47.3%)                 | 33 (33.7%)         | <0.0001                         |
